# Supplementary material
Source: MDPI journal article supplement (https://www.mdpi.com/2311-5637/4/4/86)
Supplement: s1 [file s1]

# Co-Culture of Filamentous Feed-Grade Fungi and Microalgae as an Alternative to Increase Feeding Value of Ethanol Coproducts

Cristiano E. Rodrigues Reis<sup>1,2</sup>, Larissa Ogero D'Otaviano<sup>2</sup>, Aravindan Rajendran<sup>1</sup> and Bo Hu<sup>1,\*</sup>

## Supplementary Materials

### Analysis of Variance (ANOVA) for Xylanase Production

| Analysis of Variance for Means |    |        |        |         |       |       |  |
|--------------------------------|----|--------|--------|---------|-------|-------|--|
| Source                         | DF | Seq SS | Adj SS | Adj MS  | F     | P     |  |
| pH0                            | 2  | 213.93 | 213.93 | 106.965 | 21.29 | 0.045 |  |
| Temperature                    | 2  | 36.94  | 36.94  | 18.471  | 3.68  | 0.214 |  |
| Algae:Fungi                    | 2  | 80.34  | 80.34  | 40.170  | 8.00  | 0.111 |  |
| Residual Error                 | 2  | 10.05  | 10.05  | 5.024   |       |       |  |
| Total                          | 8  | 341.26 |        |         |       |       |  |

### ANOVA for Endoglucanase Production

| Analysis of Variance for Means |    |         |        |        |       |       |  |
|--------------------------------|----|---------|--------|--------|-------|-------|--|
| Source                         | DF | Seq SS  | Adj SS | Adj MS | F     | P     |  |
| pH0                            | 2  | 50.504  | 50.504 | 25.252 | 21.55 | 0.044 |  |
| Temperature                    | 2  | 21.046  | 21.046 | 10.523 | 8.98  | 0.100 |  |
| Algae:Fungi                    | 2  | 27.564  | 27.564 | 13.782 | 11.76 | 0.078 |  |
| Residual Error                 | 2  | 2.344   | 2.344  | 1.172  |       |       |  |
| Total                          | 8  | 101.458 |        |        |       |       |  |

### ANOVA for Cellulase Production

| Analysis of Variance for Means |    |         |        |        |       |       |  |
|--------------------------------|----|---------|--------|--------|-------|-------|--|
| Source                         | DF | Seq SS  | Adj SS | Adj MS | F     | P     |  |
| pH0                            | 2  | 97.369  | 97.369 | 48.684 | 24.15 | 0.040 |  |
| Temperature                    | 2  | 30.296  | 30.296 | 15.148 | 7.51  | 0.117 |  |
| Algae:Fungi                    | 2  | 45.656  | 45.656 | 22.828 | 11.32 | 0.081 |  |
| Residual Error                 | 2  | 4.032   | 4.032  | 2.016  |       |       |  |
| Total                          | 8  | 177.352 |        |        |       |       |  |

### ANOVA for Lipid Accumulation

| Analysis of Variance for Means |    |        |        |         |       |       |  |
|--------------------------------|----|--------|--------|---------|-------|-------|--|
| Source                         | DF | Seq SS | Adj SS | Adj MS  | F     | P     |  |
| pH0                            | 2  | 63.654 | 63.654 | 31.8272 | 37.92 | 0.026 |  |
| Temperature                    | 2  | 11.162 | 11.162 | 5.5812  | 6.65  | 0.131 |  |
| Algae:Fungi                    | 2  | 17.089 | 17.089 | 8.5444  | 10.18 | 0.089 |  |
| Residual Error                 | 2  | 1.679  | 1.679  | 0.8393  |       |       |  |
| Total                          | 8  | 93.584 |        |         |       |       |  |

### ANOVA for C18:2% production in regards to total lipids

| Analysis of Variance for Means |    |          |          |          |      |       |  |
|--------------------------------|----|----------|----------|----------|------|-------|--|
| Source                         | DF | Seq SS   | Adj SS   | Adj MS   | F    | P     |  |
| pH0                            | 2  | 0.150770 | 0.150770 | 0.075385 | 3.35 | 0.230 |  |
| Temperature                    | 2  | 0.038919 | 0.038919 | 0.019460 | 0.87 | 0.536 |  |

|                |   |          |          |          |      |       |
|----------------|---|----------|----------|----------|------|-------|
| Algae:Fungi    | 2 | 0.001053 | 0.001053 | 0.000527 | 0.02 | 0.977 |
| Residual Error | 2 | 0.044956 | 0.044956 | 0.022478 |      |       |
| Total          | 8 | 0.235698 |          |          |      |       |

Supplementary Figures

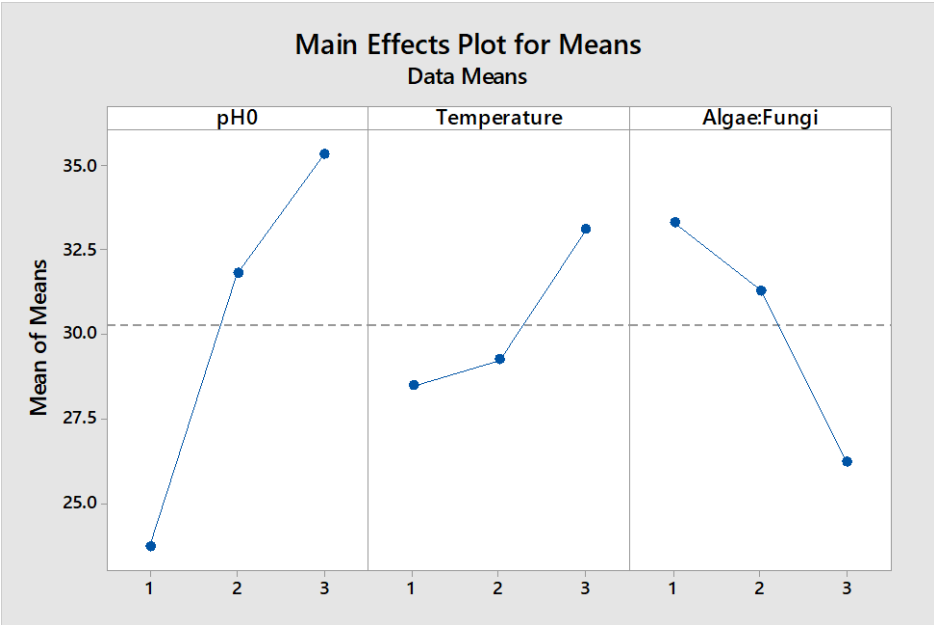

Figure S1. Main Effects Plot for Means in regards to Xylanase Production.

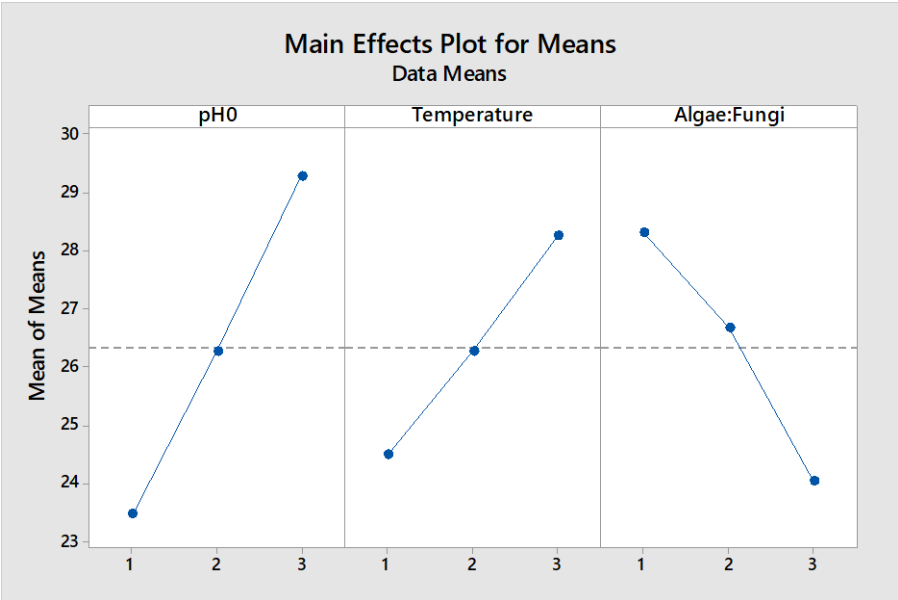

Figure S2. Main Effects Plot for Means in regards to Endoglucanase Production.

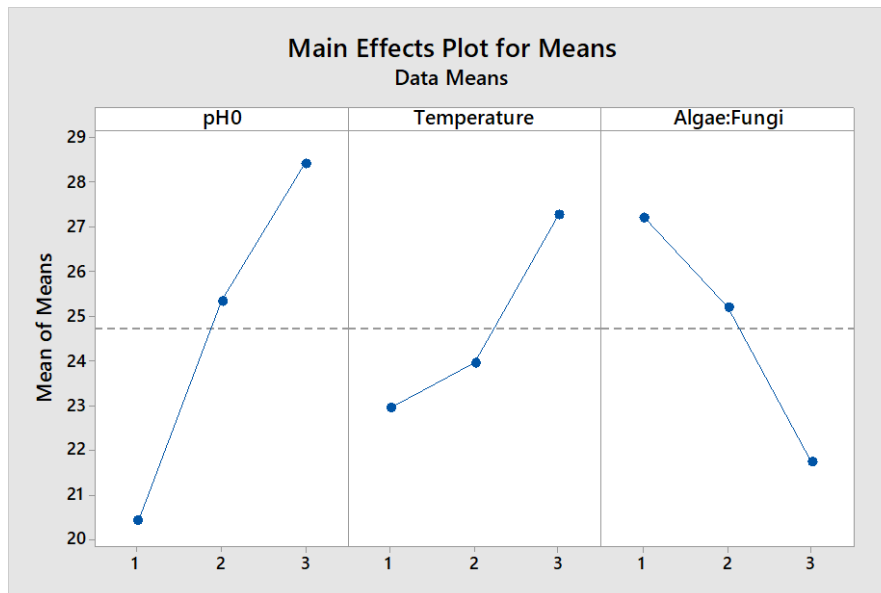

**Figure S3.** Main Effects Plot for Means in regards to Xylanase Production.

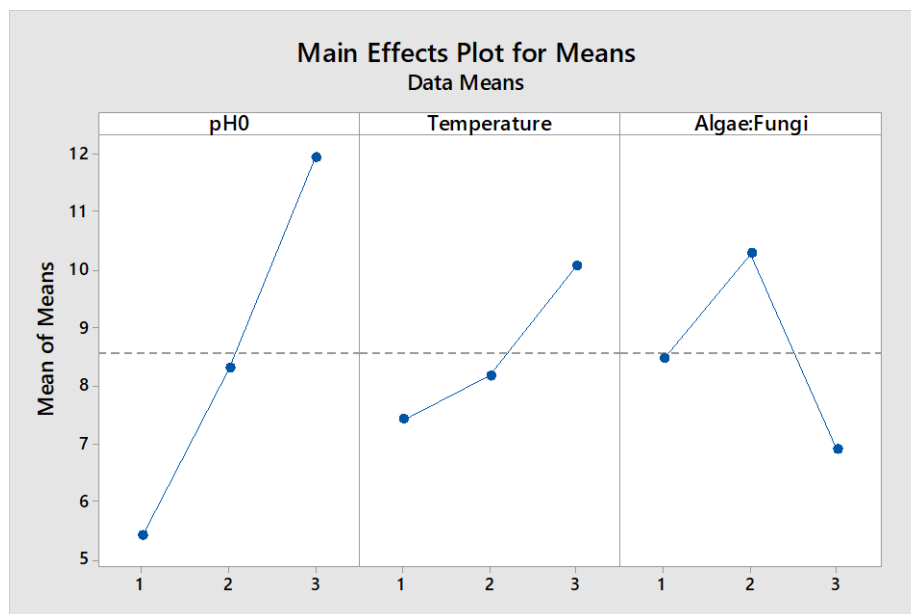

**Figure S4.** Main Effects Plot for Means in regards to Lipid Accumulation.

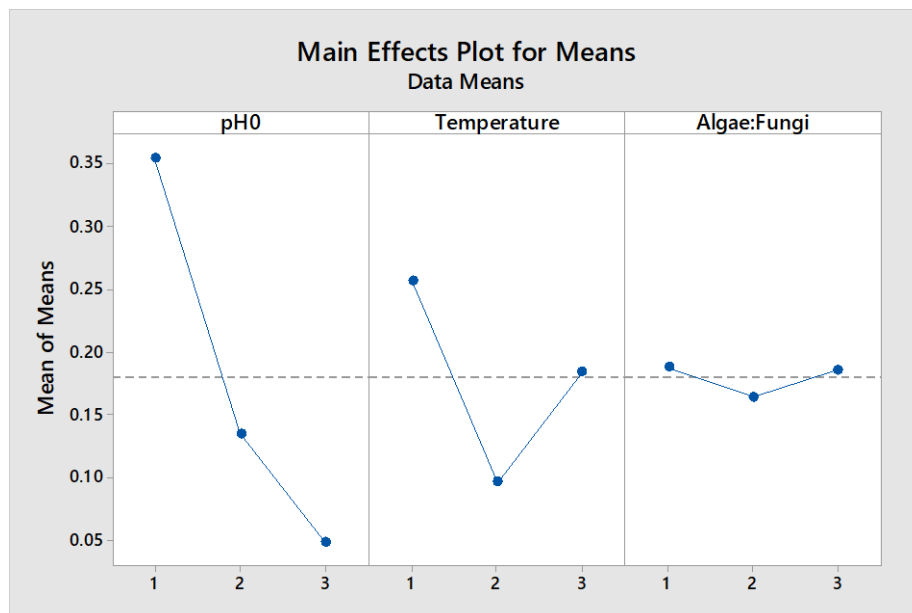

**Figure S5.** Main Effects Plot for Means in regards to C18:2 Percentage of Total Lipids.

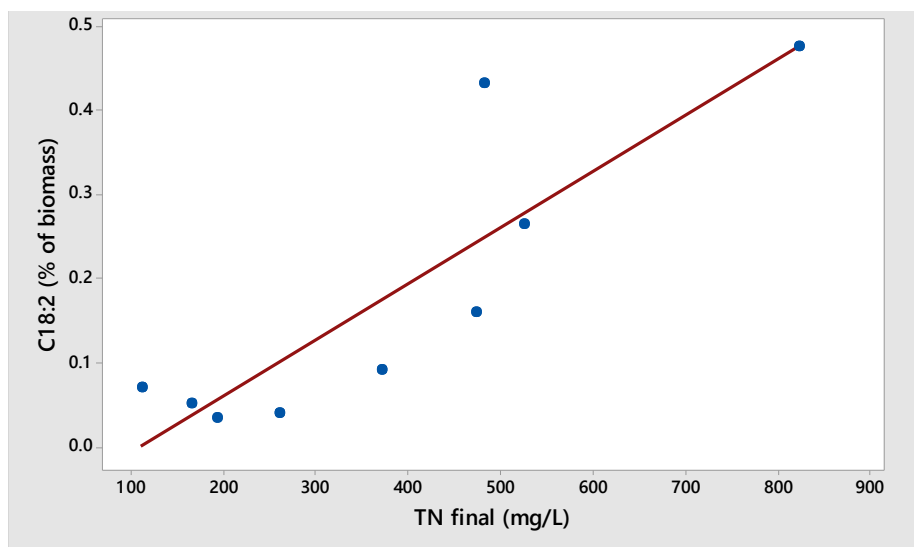

**Figure S6.** Scatterplot of C18:2% and TN<sub>f</sub>. Pearson correlation of C18:2 (% of biomass) and TN final (mg/L) = 0.871. P-Value = 0.002.

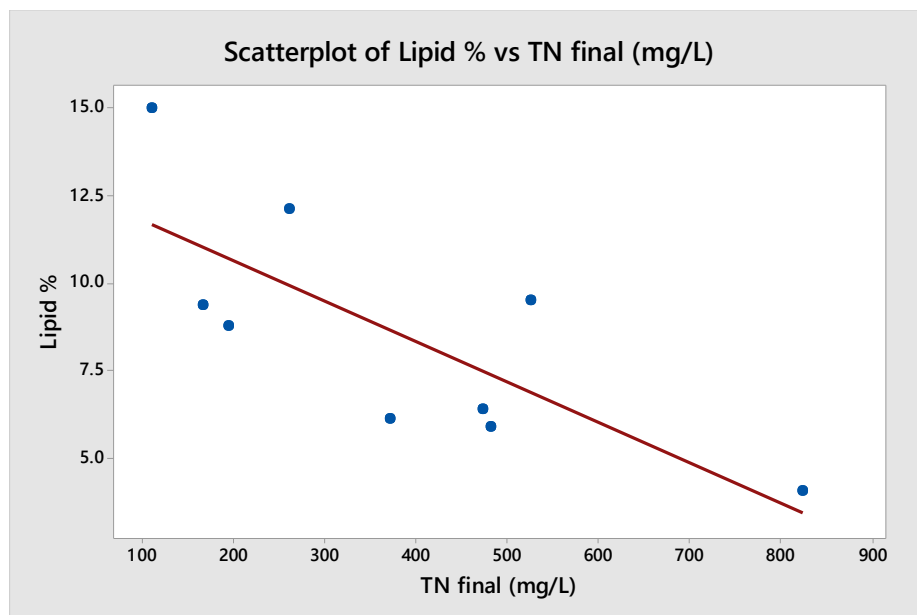

**Figure S7.** Scatterplot of Lipid % and TN<sub>f</sub>. Pearson correlation of Lipid % and TN final (mg/L) = -0.760. P-Value = 0.017.
